# Supplementary material for: The facile assembly of bis-, tris- and poly(triazaphosphole) systems using “click” chemistry
Source: Royal Society of Chemistry journal article supplement (doi:10.1039/c3dt50505g), 2013-01-01
Supplement: c3dt50505g.pdf [file c3dt50505g.pdf]

S1

**The Facile Assembly of Bis-, Tris- and Poly(triazaphosphole) Systems Using "Click"**

**Chemistry**

**Sam L. Choong,<sup>a</sup> Ayman Nafady,<sup>a,b</sup> Andreas Stasch,<sup>a</sup> Alan M. Bond<sup>a</sup> and Cameron Jones<sup>\*a</sup>**

<sup>a</sup> School of Chemistry, PO Box 23, Monash University, VIC, 3800, Australia

<sup>b</sup> Department of Chemistry, College of Science and Sustainable Energy Technologies (SET) Centre,  
King Saud University, PO Box 2455, Riyadh-11451, Kingdom of Saudi Arabia

**SUPPLEMENTARY INFORMATION**

**Table S1.** Summary of crystallographic data for **3**, **4** and [Fe{C<sub>5</sub>H<sub>4</sub>(N<sub>3</sub>PCBu<sup>t</sup>H)}<sub>2</sub>][CF<sub>3</sub>SO<sub>3</sub>]<sub>2</sub> **1S**.

|                                                 | <b>3</b>                                                        | <b>4</b>                                                        | <b>1S</b>                                                                                                    |
|-------------------------------------------------|-----------------------------------------------------------------|-----------------------------------------------------------------|--------------------------------------------------------------------------------------------------------------|
| empirical formula                               | C <sub>20</sub> H <sub>26</sub> FeN <sub>6</sub> P <sub>2</sub> | C <sub>14</sub> H <sub>14</sub> FeN <sub>6</sub> P <sub>2</sub> | C <sub>22</sub> H <sub>28</sub> F <sub>6</sub> FeN <sub>6</sub> O <sub>6</sub> P <sub>2</sub> S <sub>2</sub> |
| formula weight                                  | 468.26                                                          | 384.10                                                          | 768.41                                                                                                       |
| crystal system                                  | monoclinic                                                      | monoclinic                                                      | triclinic                                                                                                    |
| space group                                     | <i>P</i> 2 <sub>1</sub> / <i>c</i>                              | <i>P</i> 2 <sub>1</sub> / <i>c</i>                              | <i>P</i> -1                                                                                                  |
| <i>T</i> (K)                                    | 123(2)                                                          | 123(2)                                                          | 123(2)                                                                                                       |
| <i>a</i> (Å)                                    | 17.573(4)                                                       | 9.1840(18)                                                      | 6.5273(1)                                                                                                    |
| <i>b</i> (Å)                                    | 10.129(2)                                                       | 13.517(3)                                                       | 7.2151(1)                                                                                                    |
| <i>c</i> (Å)                                    | 12.835(3)                                                       | 12.433(3)                                                       | 16.4648(3)                                                                                                   |
| $\alpha$ (deg.)                                 | 90                                                              | 90                                                              | 97.988(2)                                                                                                    |
| $\beta$ (deg.)                                  | 93.64(3)                                                        | 91.27(3)                                                        | 90.106(2)                                                                                                    |
| $\gamma$ (deg.)                                 | 90                                                              | 90                                                              | 96.513(2)                                                                                                    |
| vol (Å <sup>3</sup> )                           | 2280.1(8)                                                       | 1543.1(5)                                                       | 762.81(2)                                                                                                    |
| <i>Z</i>                                        | 4                                                               | 4                                                               | 1                                                                                                            |
| $\rho$ (calcd) (g.cm <sup>-3</sup> )            | 1.364                                                           | 1.653                                                           | 1.673                                                                                                        |
| $\mu$ (mm <sup>-1</sup> )                       | 0.820                                                           | 1.192                                                           | 0.821                                                                                                        |
| <i>F</i> (000)                                  | 976                                                             | 784                                                             | 392                                                                                                          |
| reflections collected                           | 9466                                                            | 5131                                                            | 14897                                                                                                        |
| unique reflections                              | 4970                                                            | 2722                                                            | 4351                                                                                                         |
| <i>R</i> <sub>int</sub>                         | 0.0198                                                          | 0.0323                                                          | 0.0454                                                                                                       |
| R1 indices [ <i>I</i> >2 $\sigma$ ( <i>I</i> )] | 0.0313                                                          | 0.0350                                                          | 0.0389                                                                                                       |
| wR2 indices (all data)                          | 0.0777                                                          | 0.0800                                                          | 0.0977                                                                                                       |
| Largest peak and hole<br>(e.Å <sup>-3</sup> )   | 0.37, -0.32                                                     | 0.44, -0.26                                                     | 0.44, -1.05                                                                                                  |
| CCDC No.                                        | 925611                                                          | 925612                                                          | 925610                                                                                                       |

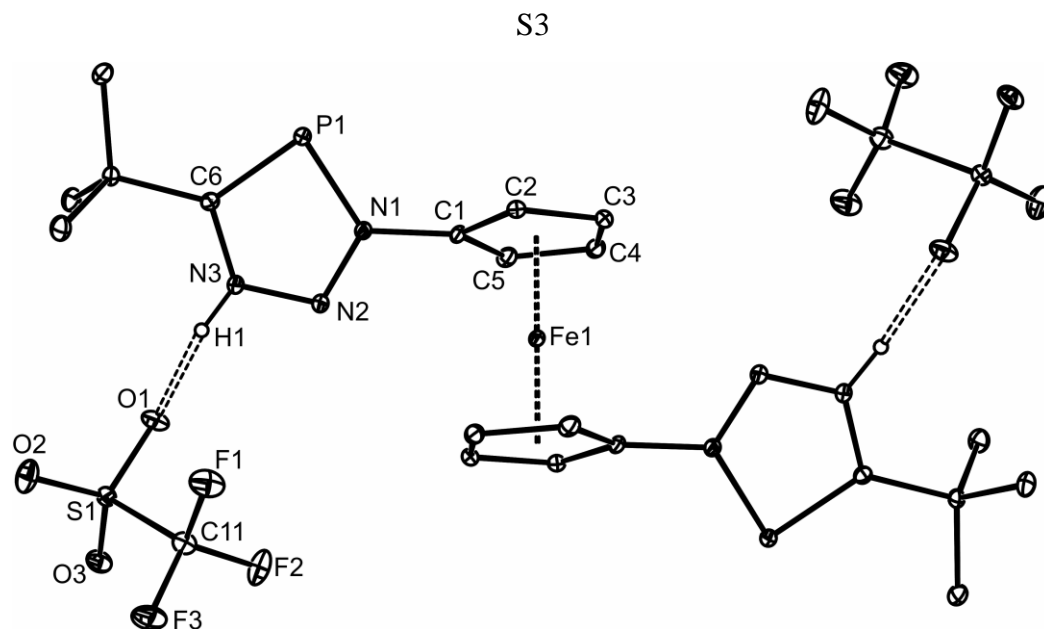

**Figure S1.** Molecular structure of **1S** (25% displacement ellipsoids are shown; hydrogens, except H(1), omitted). Selected bond lengths (Å) and angles (°): P(1)-N(1) 1.7036(16), P(1)-C(6) 1.7114(19), N(1)-N(2) 1.317(2), N(1)-C(1) 1.436(2), N(2)-N(3) 1.312(2), N(3)-C(6) 1.346(2), N(3)-H(1) 0.89(3), H(1)-O(1) 1.78(2), N(1)-P(1)-C(6) 86.27(8), N(3)-C(6)-P(1) 110.15(13), N(3)-H(1)-O(1) 163(1).

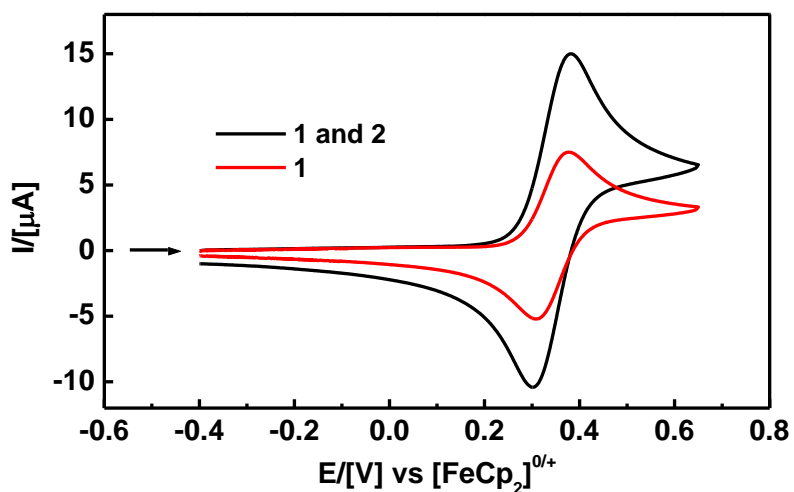

**Figure S2:** Cyclic voltammograms obtained at scan rate of  $0.1 \text{ V s}^{-1}$  with a 1.5 mm diameter glassy carbon disk electrode for 2 mM **3** (red curve) and 2 mM of both **3** and **4** (black curve) in  $\text{CH}_2\text{Cl}_2$  (0.1 M  $[\text{Bu}_4\text{N}][\text{PF}_6]$ ).

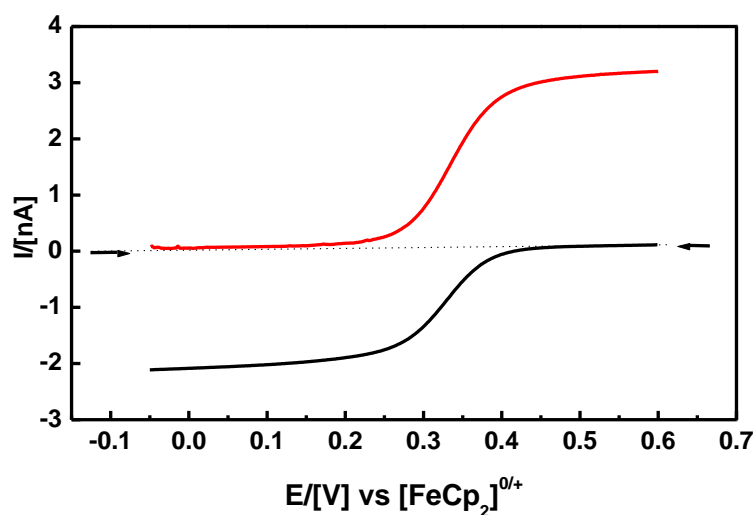

**Figure S3:** Near steady-state linear sweep voltammograms obtained at scan rate of  $0.1 \text{ V s}^{-1}$  with a Pt-microelectrode (10  $\mu\text{m}$  diameter) before (red curve) and after (black curve) oxidative bulk electrolysis at  $E_{\text{appl}} = 0.6 \text{ V}$  for 1.8 mM **3** in  $\text{CH}_2\text{Cl}_2$  (0.1 M  $[\text{Bu}_4\text{N}][\text{PF}_6]$ ).
